# Supplementary material
Source: PubMed Central journal article supplement (PMC1626358)
Supplement: rsbl20050352s06.pdf [file rsbl20050352s06.pdf]

# ELECTRONIC APPENDIX

This is the Electronic Appendix to the article

**Constraints on plastic responses to climate variation in red deer.**

by

**Daniel H. Nussey, Tim H. Clutton-Brock, Steve D. Albon, Josephine Pemberton & Loeske E. B. Kruuk**

*Biol. Lett.* ([doi:10.1098/rsbl.2005.0352](https://doi.org/10.1098/rsbl.2005.0352))

Electronic appendices are refereed with the text; however, no attempt is made to impose a uniform editorial style on the electronic appendices.

## Supplementary Online Material.

A linear mixed-effects model of offspring birth weight in red deer on the Isle of Rum, Scotland. Fixed effects terms are included for factors and covariates known to influence offspring birth weight independent of climate conditions (offspring sex, date of birth, female's reproductive status and female's age as a quadratic). The random effect for female identity ensures that all fixed effects are tested against variance in birth weight within females. Estimates of effect size and direction for fixed-effects are shown for covariates. The significance of the negative spring temperature by density in female's year of birth interaction confirms the finding using regression estimates for individual females (Figure 2): the tendency for birth weights to increase following warm springs declines as population density increases. The model includes 1,557 birth weight observations from 414 different females.

| <b>Random Effects</b>                                  |                    |        |          |
|--------------------------------------------------------|--------------------|--------|----------|
| Term                                                   | Standard Deviation |        |          |
| Female                                                 | 0.81               |        |          |
| Residual                                               | 0.93               |        |          |
| <b>Fixed Effects</b>                                   |                    |        |          |
| Term                                                   | F                  | P      | Estimate |
| Offspring sex                                          | 45.14              | <0.001 |          |
| Female's reproductive status                           | 37.42              | <0.001 |          |
| Female's age                                           | 19.67              | <0.001 | 0.324    |
| Female's age <sup>2</sup>                              | 35.77              | <0.001 | -0.020   |
| Offspring date of birth                                | 34.84              | <0.001 | 0.011    |
| Spring temperature                                     | 23.96              | <0.001 | 0.593    |
| Density in female's year of birth                      | 0.03               | 0.86   | 0.028    |
| Spring temperature * Density in female's year of birth | 21.52              | <0.001 | -0.003   |
